# Supplementary material
Source: PubMed Central journal article supplement (PMC8010583)
Supplement: NIHMS1685423-supplement-1.pdf [file NIHMS1685423-supplement-1.pdf]

*Table S1. Standardized factor loadings for overall sample and for males and females separately for Self-Management to Time Factor of BDEFS.*

| <i>Item</i> | <i>Overall</i> | <i>Males</i> | <i>Females</i> | <i>Cross-Loading</i> | <i>Invariance</i> |
|-------------|----------------|--------------|----------------|----------------------|-------------------|
| 1.          | .624           | .539         | .669           |                      | Sex, IA, HY       |
| 2.          | .716           | .746         | .703           |                      |                   |
| 3.          | .754           | .704         | .779           |                      |                   |
| 4.          | .759           | .754         | .760           |                      |                   |
| 5.          | .696           | .716         | .690           | F3 <sup>^</sup>      |                   |
| 6.          | .766           | .760         | .775           |                      |                   |
| 7.          | .735           | .768         | .721           |                      |                   |
| 8.          | .822           | .836         | .815           |                      |                   |
| 9.          | .640           | .711         | .601           | F3 <sup>+</sup>      |                   |
| 10.         | .803           | .816         | .799           | F2 <sup>+</sup>      |                   |
| 11.         | .769           | .766         | .775           |                      |                   |
| 12.         | .733           | .710         | .744           |                      |                   |
| 13.         | .834           | .832         | .834           |                      |                   |
| 14.         | .867           | .866         | .866           |                      |                   |
| 15.         | .832           | .812         | .842           |                      |                   |
| 16.         | .803           | .795         | .809           |                      |                   |
| 17.         | .864           | .871         | .861           |                      |                   |
| 18.         | .776           | .825         | .752           | F3 <sup>*</sup>      |                   |
| 19.         | .783           | .787         | .779           |                      |                   |
| 20.         | .832           | .838         | .830           |                      |                   |
| 21.         | .836           | .812         | .849           |                      |                   |

*Note.* All factor loadings significant at  $p < .001$ . \* indicates item cross-loading  $> .25$ , <sup>+</sup> indicates item cross-loading  $> .30$ , <sup>^</sup> indicates item cross-loading  $> .35$ . Sex=item threshold influenced by sex, IA=item threshold influenced by inattention symptoms, HY=item threshold influenced by hyperactivity-impulsivity symptoms.

*Table S2. Standardized factor loadings for overall sample and for males and females separately for Organization Problems Factor of BDEFS.*

| <i>Item</i> | <i>Overall</i> | <i>Males</i> | <i>Females</i> | <i>Cross-Loading</i> | <i>Invariance</i> |
|-------------|----------------|--------------|----------------|----------------------|-------------------|
| 22.         | .719           | .783         | .683           |                      | IA, HY            |
| 23.         | .722           | .750         | .711           | F3*                  |                   |
| 24.         | .802           | .830         | .787           | F1 <sup>+</sup>      |                   |
| 25.         | .775           | .798         | .764           |                      |                   |
| 26.         | .780           | .769         | .786           | F3*                  |                   |
| 27.         | .665           | .681         | .659           |                      |                   |
| 28.         | .733           | .725         | .736           |                      |                   |
| 29.         | .713           | .747         | .697           |                      |                   |
| 30.         | .712           | .762         | .687           |                      |                   |
| 31.         | .618           | .612         | .620           |                      |                   |
| 32.         | .790           | .823         | .773           |                      |                   |
| 33.         | .799           | .788         | .805           |                      |                   |
| 34.         | .790           | .798         | .787           |                      |                   |
| 35.         | .775           | .780         | .774           |                      |                   |
| 36.         | .804           | .768         | .827           | F3 <sup>+</sup>      |                   |
| 37.         | .683           | .723         | .664           |                      |                   |
| 38.         | .819           | .842         | .809           |                      |                   |
| 39.         | .768           | .772         | .772           | F1*                  | IA, HY            |
| 40.         | .753           | .761         | .752           |                      |                   |
| 41.         | .876           | .887         | .866           | F1 <sup>+</sup>      | IA                |
| 42.         | .802           | .829         | .796           |                      |                   |
| 43.         | .844           | .814         | .859           | F1 <sup>+</sup>      | IA                |
| 44.         | .839           | .822         | .848           | F1 <sup>+</sup>      |                   |
| 45.         | .838           | .866         | .827           |                      |                   |

*Note.* All factor loadings significant at  $p < .001$ . \* indicates item cross-loading  $> .25$ , <sup>+</sup> indicates item cross-loading  $> .30$ , ^ indicates item cross-loading  $> .35$ . Sex=item threshold influenced by sex, IA=item threshold influenced by inattention symptoms, HY=item threshold influenced by hyperactivity-impulsivity symptoms.

*Table S3. Standardized factor loadings for overall sample and for males and females separately for Self-Restraint Problems Factor of BDEFS.*

| <i>Item</i> | <i>Overall</i> | <i>Males</i> | <i>Females</i> | <i>Cross-Loading</i> | <i>Invariance</i> |
|-------------|----------------|--------------|----------------|----------------------|-------------------|
| 46.         | .637           | .660         | .625           | F5*                  | Sex               |
| 47.         | .673           | .641         | .694           |                      |                   |
| 48.         | .823           | .831         | .812           |                      |                   |
| 49.         | .814           | .813         | .816           |                      |                   |
| 50.         | .764           | .768         | .766           |                      |                   |
| 51.         | .668           | .684         | .662           |                      |                   |
| 52.         | .762           | .706         | .796           |                      |                   |
| 53.         | .615           | .617         | .619           |                      |                   |
| 54.         | .809           | .762         | .826           |                      |                   |
| 55.         | .758           | .733         | .775           | F2*                  |                   |
| 56.         | .709           | .750         | .686           | F5*                  |                   |
| 57.         | .704           | .701         | .705           |                      |                   |
| 58.         | .794           | .780         | .797           |                      |                   |
| 59.         | .783           | .768         | .795           |                      |                   |
| 60.         | .441           | .363         | .492           | F4*                  |                   |
| 61.         | .642           | .676         | .624           |                      | Sex               |
| 62.         | .776           | .781         | .771           |                      |                   |
| 63.         | .805           | .778         | .820           |                      |                   |
| 64.         | .575           | .514         | .634           | F4*                  | Sex               |

*Note.* All factor loadings significant at  $p < .001$ . \* indicates item cross-loading  $> .25$ , + indicates item cross-loading  $> .30$ , ^ indicates item cross-loading  $> .35$ . Sex=item threshold influenced by sex, IA=item threshold influenced by inattention symptoms, HY=item threshold influenced by hyperactivity-impulsivity symptoms.

*Table S4. Standardized factor loadings for overall sample and for males and females separately for Motivation Problems Factor of BDEFS.*

---

| <i>Item</i> | <i>Overall</i> | <i>Males</i> | <i>Females</i> | <i>Cross-Loading</i> | <i>Invariance</i> |
|-------------|----------------|--------------|----------------|----------------------|-------------------|
| 65.         | .703           | .657         | .729           |                      | IA                |
| 66.         | .719           | .688         | .734           |                      |                   |
| 67.         | .810           | .780         | .826           |                      |                   |
| 68.         | .722           | .743         | .707           |                      |                   |
| 69.         | .785           | .759         | .802           | F3*                  |                   |
| 70.         | .825           | .813         | .839           |                      |                   |
| 71.         | .743           | .679         | .778           |                      |                   |
| 72.         | .863           | .848         | .867           |                      |                   |
| 73.         | .865           | .878         | .856           |                      |                   |
| 74.         | .880           | .877         | .878           |                      |                   |
| 75.         | .895           | .899         | .893           |                      |                   |
| 76.         | .813           | .798         | .825           |                      |                   |

---

*Note.* All factor loadings significant at  $p < .001$ . \* indicates item cross-loading  $> .25$ , + indicates item cross-loading  $> .30$ , ^ indicates item cross-loading  $> .35$ . Sex=item threshold influenced by sex, IA=item threshold influenced by inattention symptoms, HY=item threshold influenced by hyperactivity-impulsivity symptoms.

*Table S5. Standardized factor loadings for overall sample and for males and females separately for Self-Regulation Problems Factor of BDEFS.*

| <i>Item</i> | <i>Overall</i> | <i>Males</i> | <i>Females</i> | <i>Cross-Loading</i> | <i>Invariance</i> |
|-------------|----------------|--------------|----------------|----------------------|-------------------|
| 77.         | .729           | .757         | .711           | F3 <sup>+</sup>      |                   |
| 78.         | .750           | .782         | .746           |                      | Sex               |
| 79.         | .435           | .434         | .438           |                      | HY                |
| 80.         | .713           | .739         | .694           |                      |                   |
| 81.         | .849           | .819         | .865           |                      |                   |
| 82.         | .870           | .883         | .865           |                      |                   |
| 83.         | .845           | .808         | .863           |                      |                   |
| 84.         | .886           | .906         | .869           |                      |                   |
| 85.         | .830           | .852         | .819           |                      |                   |
| 86.         | .814           | .811         | .817           |                      |                   |
| 87.         | .874           | .840         | .886           |                      |                   |
| 88.         | .871           | .843         | .885           |                      |                   |
| 89.         | .878           | .863         | .884           |                      |                   |

*Note.* All factor loadings significant at  $p < .001$ . \* indicates item cross-loading  $> .25$ , <sup>+</sup> indicates item cross-loading  $> .30$ , <sup>^</sup> indicates item cross-loading  $> .35$ . Sex=item threshold influenced by sex, IA=item threshold influenced by inattention symptoms, HY=item threshold influenced by hyperactivity-impulsivity symptoms.

*Table S6. Comparison of Demographic Characteristics and Descriptive Statistics of Adults Who Completed Barkley Deficits in Executive Functioning Scale (BDEFS; Full and Reduced Samples)*

|                                          | Full Sample | Reduced Sample |
|------------------------------------------|-------------|----------------|
| N                                        | 3,172       | 1,311          |
| % Female                                 | 69.8        | 64.9           |
| Age (SD)                                 | 19.2 (1.52) | 19.3 (1.44)    |
| % Caucasian                              | 80.4        | 79.8           |
| % Asian/Asian American                   | 6.4         | 7.5            |
| % Black/African American                 | 6.3         | 6.6            |
| % Native Hawaiian/Other Pacific Islander | 0.7         | 0.4            |
| % American Indian/Alaska Native          | 0.6         | 0.6            |
| % Biracial/Multiracial                   | 5.6         | 4.6            |
| % Hispanic/Latino                        | 6.7         | 6.0            |
| % 1 <sup>st</sup> Year of College        | 59.5        | 64.1           |
| % 2 <sup>nd</sup> Year of College        | 20.4        | 18.8           |
| % 3 <sup>rd</sup> Year of College        | 12.1        | 10.7           |
| % 4 <sup>th</sup> Year of College        | 7.5         | 5.9            |
| % Other Year of College                  | 0.4         | 0.5            |
| % No diagnoses                           | 75.3        | 74.7           |
| % Anxiety                                | 12.6        | 13.5           |
| % Depression                             | 12.3        | 13.0           |
| % ADD/ADHD                               | 9.4         | 9.2            |
| % Learning Disorder                      | 2.5         | 2.4            |
| % Personality Disorder                   | 0.4         | 0.5            |
| % Bipolar Disorder                       | 0.8         | 0.7            |
| % Alcohol abuse/disorder                 | 0.3         | 0.2            |
| % Autism/Asperger's                      | 0.2         | 0.1            |
| % Schizophrenia                          | 0.1         | 0.0            |

*Note.* SD=standard deviation. All adults were administered the BDEFS; however, n=1,861 participants did not complete the final three items due to an administration error. Therefore, the table presented here shows the full sample (including those with missing data on those three items) compared to the reduced sample (only those with complete BDEFS data). All analyses were conducted using the reduced sample.

*Table S7. Correlations, Means, and Standard Deviations of Barkley Deficits in Executive Functioning Scale (BDEFS) Factors*

| BDEFS Factor | F1          | F2          | F3          | F4          | F5          |
|--------------|-------------|-------------|-------------|-------------|-------------|
| F1           | —           | .72**       | .59**       | .72**       | .48**       |
| F2           |             | —           | .68**       | .68**       | .57**       |
| F3           |             |             | —           | .66**       | .63**       |
| F4           |             |             |             | —           | .48**       |
| F5           |             |             |             |             | —           |
| Mean (SD)    | 1.91 (0.61) | 1.72 (0.55) | 1.64 (0.48) | 1.78 (0.65) | 1.76 (0.60) |

*Note.* SD=standard deviation. F1= Self-Management to Time, F2= Organization/Problem-Solving, F3= Self-Restraint, F4= Self-Motivation, F5= Self-Regulation of Emotions. \*\*p<.01.
